# Supplementary material
Source: Springer Nature journal article supplement (https://www.springermedizin.de/resource/supplementary/12967_2006_166_MOESM5_ESM.pdf/9575974)

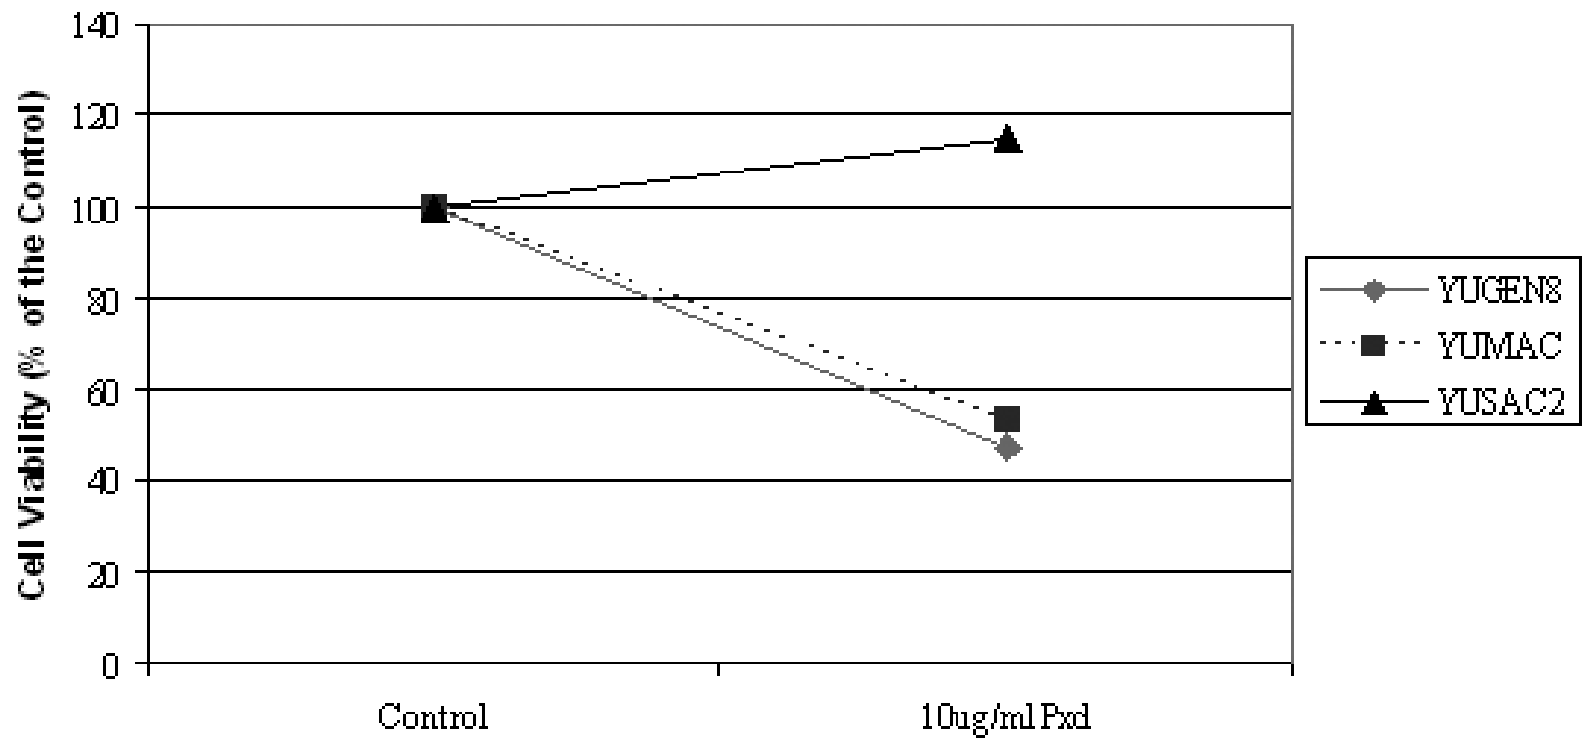

Supplement: MOESM5 [file 9575974]
